# Supplementary material
Source: Springer Nature journal article supplement (https://www.springermedizin.de/resource/supplementary/12889_2009_2312_MOESM6_ESM.pdf/9485352)

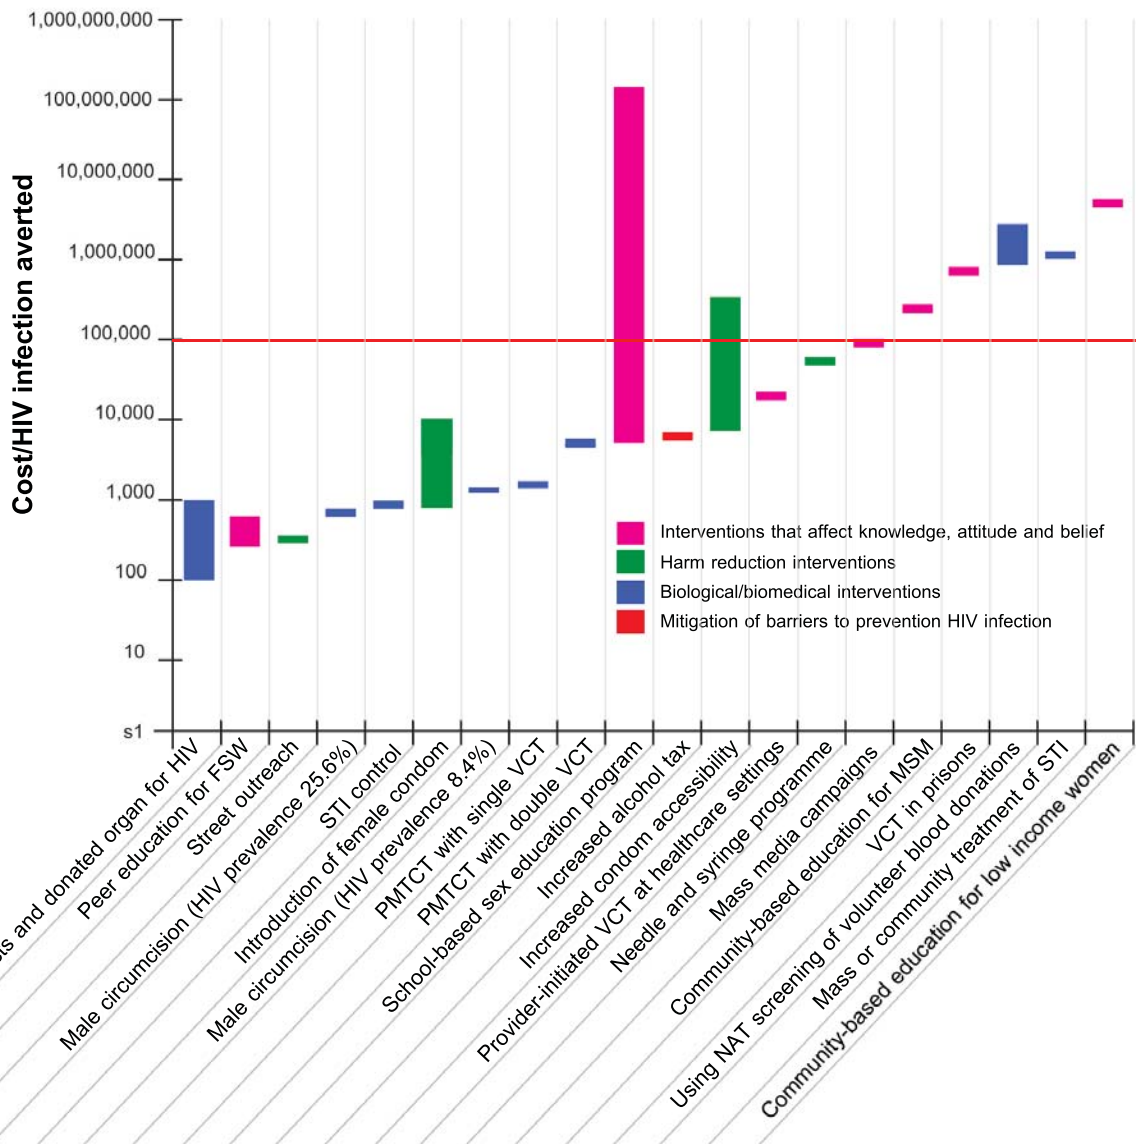

Supplement: MOESM6 [file 9485352]
